# Supplementary material for: Isolation of a non-genomic origin fluoroquinolone responsive regulatory element using a combinatorial bioengineering approach
Source: PubMed Central journal article supplement — Nucleic Acids Res. 2016 Feb 2;44(5):2451–61. doi: 10.1093/nar/gkw029 (PMC4797293; doi:10.1093/nar/gkw029), 2016-02-02

## Supplementary Information

### Isolation of a Non-genomic Origin Fluoroquinolone Responsive Regulatory Element Using a Combinatorial Bioengineering Approach.

Santosh Kumar Srivastava<sup>1</sup>, V. Rajesh Iyer<sup>1</sup>, Tamoghna Ghosh<sup>1</sup>, Paramesh Ramulu Lambadi<sup>1</sup>, and Ranjana Pathania<sup>1</sup> Naveen Kumar Navani<sup>1,\*</sup>,

<sup>1</sup> Department of Biotechnology, Indian Institute of Technology Roorkee, Uttarakhand, India, 247 667

#### Supplementary Table 1.

Bacterial strains used in the study.

Genotype and description of each strain as acquired from EcoCyc (<http://ecocyc.org/>).

| Strains                              | Genotype and description                                                                                                                                                                                                                                      |
|--------------------------------------|---------------------------------------------------------------------------------------------------------------------------------------------------------------------------------------------------------------------------------------------------------------|
| <i>E. coli</i> DH5α                  | F <sup>-</sup> , <i>deoR</i> , <i>endA1</i> , <i>gyrA96</i> , <i>hsdR17</i> (rK <sup>-</sup> /mK <sup>+</sup> ), <i>recA1</i> , <i>phoA</i> , <i>relA1</i> , <i>thi-1</i> , Δ( <i>lac ZYA-argF</i> ), U169φ80Δ <i>lacZ</i> ΔM15λ <sup>-</sup> , <i>supE44</i> |
| <i>E. coli</i> MG1655                | F <sup>-</sup> λ <sup>-</sup> <i>ilvG</i> - <i>rfb-50</i> <i>rph-1</i>                                                                                                                                                                                        |
| <i>E. coli</i> RFM443                | ( <i>rpsL galK2</i> Δ <i>lac74</i> ) streptomycin resistant                                                                                                                                                                                                   |
| <i>E. coli</i> BW25113 (Wild type)   | F <sup>-</sup> , Δ( <i>araD-araB</i> )567, Δ <i>lacZ4787</i> (:: <i>rrnB-3</i> ), λ <sup>-</sup> , <i>rph-1</i> , Δ( <i>rhaD-rhaB</i> )568, <i>hsdR514</i>                                                                                                    |
| <i>E. coli</i> BW25113 Δ <i>cra</i>  | F <sup>-</sup> , Δ( <i>araD-araB</i> )567, Δ <i>lacZ4787</i> (:: <i>rrnB-3</i> ), λ <sup>-</sup> , <i>rph-1</i> , Δ( <i>rhaD-rhaB</i> )568, <i>hsdR514</i> , Δ <i>cra</i> (deletion mutant of Catabolite repressor activator)                                 |
| <i>E. coli</i> BW25113 Δ <i>cueR</i> | F <sup>-</sup> , Δ( <i>araD-araB</i> )567, Δ <i>lacZ4787</i> (:: <i>rrnB-3</i> ), λ <sup>-</sup> , <i>rph-1</i> , Δ( <i>rhaD-rhaB</i> )568, <i>hsdR514</i> , Δ <i>cueR</i> (deletion mutant of Cu efflux regulator)                                           |
| <i>E. coli</i> BW25113 Δ <i>dksA</i> | F <sup>-</sup> , Δ( <i>araD-araB</i> )567, Δ <i>lacZ4787</i> (:: <i>rrnB-3</i> ), λ <sup>-</sup> , <i>rph-1</i> , Δ( <i>rhaD-rhaB</i> )568, <i>hsdR514</i> , Δ <i>dksA</i> (deletion mutant of                                                                |
| <i>E. coli</i> BW25113 Δ <i>yaiA</i> | F <sup>-</sup> , Δ( <i>araD-araB</i> )567, Δ <i>lacZ4787</i> (:: <i>rrnB-3</i> ), λ <sup>-</sup> , <i>rph-1</i> , Δ( <i>rhaD-rhaB</i> )568, <i>hsdR514</i> , Δ <i>yaiA</i> (deletion mutant of OxyR-dependent induction of expression by hydrogen peroxide)   |
| <i>E. coli</i> BW25113 Δ <i>ykqD</i> | F <sup>-</sup> , Δ( <i>araD-araB</i> )567, Δ <i>lacZ4787</i> (:: <i>rrnB-3</i> ), λ <sup>-</sup> , <i>rph-1</i> , Δ( <i>rhaD-rhaB</i> )568, <i>hsdR514</i> , Δ <i>ykqD</i> (deletion mutant of redox-sensitive transcriptional activator)                     |
| <i>E. coli</i> BW25113 Δ <i>nhaR</i> | F <sup>-</sup> , Δ( <i>araD-araB</i> )567, Δ <i>lacZ4787</i> (:: <i>rrnB-3</i> ), λ <sup>-</sup> , <i>rph-1</i> , Δ( <i>rhaD-rhaB</i> )568, <i>hsdR514</i> , Δ <i>nhaR</i> (deletion mutant of "Na <sup>+</sup> /H <sup>+</sup> antiporter Regulator)         |
| <i>E. coli</i> BW25113 Δ <i>atoC</i> | F <sup>-</sup> , Δ( <i>araD-araB</i> )567, Δ <i>lacZ4787</i> (:: <i>rrnB-3</i> ), λ <sup>-</sup> , <i>rph-1</i> , Δ( <i>rhaD-rhaB</i> )568, <i>hsdR514</i> , Δ <i>atoC</i> (deletion mutant of antizyme protein inhibitor of                                  |

|                                             |                                                                                                                                                                                                                                                                                                                                                                                                                                                   |
|---------------------------------------------|---------------------------------------------------------------------------------------------------------------------------------------------------------------------------------------------------------------------------------------------------------------------------------------------------------------------------------------------------------------------------------------------------------------------------------------------------|
|                                             | ornithine decarboxylase)                                                                                                                                                                                                                                                                                                                                                                                                                          |
| <i>E. coli</i> BW25113 $\Delta$ <i>fadR</i> | <i>F</i> -, $\Delta$ ( <i>araD-araB</i> )567, $\Delta$ <i>lacZ</i> 4787( <i>::rrnB-3</i> ), $\lambda$ , <i>rph-1</i> , $\Delta$ ( <i>rhaD-rhaB</i> )568, <i>hsdR514</i> , $\Delta$ <i>fadR</i> (deletion mutant of <b>F</b> atty <b>a</b> cid <b>d</b> egradation <b>R</b> egulon)                                                                                                                                                                |
| <i>E. coli</i> BW25113 $\Delta$ <i>acr</i>  | <i>F</i> -, $\Delta$ ( <i>araD-araB</i> )567, $\Delta$ <i>lacZ</i> 4787( <i>::rrnB-3</i> ), $\lambda$ , <i>rph-1</i> , $\Delta$ ( <i>rhaD-rhaB</i> )568, <i>hsdR514</i> , $\Delta$ <i>acr</i> (deletion mutant of <i>acr</i> gene involved with <b>A</b> cridine transport)                                                                                                                                                                       |
| <i>E. coli</i> BW25113 $\Delta$ <i>mprA</i> | <i>F</i> -, $\Delta$ ( <i>araD-araB</i> )567, $\Delta$ <i>lacZ</i> 4787( <i>::rrnB-3</i> ), $\lambda$ , <i>rph-1</i> , $\Delta$ ( <i>rhaD-rhaB</i> )568, <i>hsdR514</i> , $\Delta$ <i>mprA</i> (deletion mutant of <b>m</b> ultidrug <b>r</b> esistance <b>r</b> egulator)                                                                                                                                                                        |
| <i>E. coli</i> BW25113 $\Delta$ <i>fur</i>  | <i>F</i> -, $\Delta$ ( <i>araD-araB</i> )567, $\Delta$ <i>lacZ</i> 4787( <i>::rrnB-3</i> ), $\lambda$ , <i>rph-1</i> , $\Delta$ ( <i>rhaD-rhaB</i> )568, <i>hsdR514</i> , $\Delta$ <i>fur</i> (deletion mutant of <b>F</b> erric <b>U</b> ptake <b>R</b> egulation)                                                                                                                                                                               |
| <i>E. coli</i> BW25113 $\Delta$ <i>recA</i> | <i>F</i> -, $\Delta$ ( <i>araD-araB</i> )567, $\Delta$ <i>lacZ</i> 4787( <i>::rrnB-3</i> ), $\lambda$ , <i>rph-1</i> , $\Delta$ ( <i>rhaD-rhaB</i> )568, <i>hsdR514</i> , $\Delta$ <i>recA</i> (deletion mutant of <b>R</b> ecombination protein <b>A</b> )                                                                                                                                                                                       |
| <i>E. coli</i> BW25113 $\Delta$ <i>cusR</i> | <i>F</i> -, $\Delta$ ( <i>araD-araB</i> )567, $\Delta$ <i>lacZ</i> 4787( <i>::rrnB-3</i> ), $\lambda$ , <i>rph-1</i> , $\Delta$ ( <i>rhaD-rhaB</i> )568, <i>hsdR514</i> , $\Delta$ <i>cusR</i> (deletion mutant of <b>Cu</b> -sensing <b>r</b> egulator)                                                                                                                                                                                          |
| <i>E. coli</i> BW25113 $\Delta$ <i>lrp</i>  | <i>F</i> -, $\Delta$ ( <i>araD-araB</i> )567, $\Delta$ <i>lacZ</i> 4787( <i>::rrnB-3</i> ), $\lambda$ , <i>rph-1</i> , $\Delta$ ( <i>rhaD-rhaB</i> )568, <i>hsdR514</i> , $\Delta$ <i>lrp</i> (deletion mutant of <b>L</b> eucline-responsive <b>r</b> egulatory <b>p</b> rotein)                                                                                                                                                                 |
| <i>E. coli</i> BW25113 $\Delta$ <i>fis</i>  | <i>F</i> -, $\Delta$ ( <i>araD-araB</i> )567, $\Delta$ <i>lacZ</i> 4787( <i>::rrnB-3</i> ), $\lambda$ , <i>rph-1</i> , $\Delta$ ( <i>rhaD-rhaB</i> )568, <i>hsdR514</i> , $\Delta$ <i>fis</i> (deletion mutant of <b>f</b> actor for <b>i</b> nversion <b>s</b> timulation)                                                                                                                                                                       |
| <i>E. coli</i> BW25113 $\Delta$ <i>arcA</i> | <i>F</i> -, $\Delta$ ( <i>araD-araB</i> )567, $\Delta$ <i>lacZ</i> 4787( <i>::rrnB-3</i> ), $\lambda$ , <i>rph-1</i> , $\Delta$ ( <i>rhaD-rhaB</i> )568, <i>hsdR514</i> , $\Delta$ <i>arcA</i> (deletion mutant of dual transcriptional regulator for <b>A</b> noxia <b>r</b> edox <b>c</b> ontrol)                                                                                                                                               |
| <i>E. coli</i> BW25113 $\Delta$ <i>fnr</i>  | <i>F</i> -, $\Delta$ ( <i>araD-araB</i> )567, $\Delta$ <i>lacZ</i> 4787( <i>::rrnB-3</i> ), $\lambda$ , <i>rph-1</i> , $\Delta$ ( <i>rhaD-rhaB</i> )568, <i>hsdR514</i> , $\Delta$ <i>fnr</i> (deletion mutant of primary transcriptional regulator, <b>FNR</b> activates genes involved in anaerobic metabolism and represses genes involved in aerobic metabolism)                                                                              |
| <i>E. coli</i> BW25113 $\Delta$ <i>hu</i>   | <i>F</i> -, $\Delta$ ( <i>araD-araB</i> )567, $\Delta$ <i>lacZ</i> 4787( <i>::rrnB-3</i> ), $\lambda$ , <i>rph-1</i> , $\Delta$ ( <i>rhaD-rhaB</i> )568, <i>hsdR514</i> , $\Delta$ <i>hu</i> (deletion mutant of The <b>HU</b> protein is a small DNA-binding protein that is considered a global regulatory protein and shares properties with histones, which play an important role in nucleoid organization and regulation).                  |
| <i>E. coli</i> BW25113 $\Delta$ <i>sodA</i> | <i>F</i> -, $\Delta$ ( <i>araD-araB</i> )567, $\Delta$ <i>lacZ</i> 4787( <i>::rrnB-3</i> ), $\lambda$ , <i>rph-1</i> , $\Delta$ ( <i>rhaD-rhaB</i> )568, <i>hsdR514</i> , $\Delta$ <i>sodA</i> (deletion mutant of superoxide dismutases)                                                                                                                                                                                                         |
| <i>E. coli</i> BW25113 $\Delta$ <i>stpA</i> | <i>F</i> -, $\Delta$ ( <i>araD-araB</i> )567, $\Delta$ <i>lacZ</i> 4787( <i>::rrnB-3</i> ), $\lambda$ , <i>rph-1</i> , $\Delta$ ( <i>rhaD-rhaB</i> )568, <i>hsdR514</i> , $\Delta$ <i>stpA</i> (deletion mutant of <b>StpA</b> protein <b>S</b> uppressor of <b>td</b> <b>p</b> henotype <b>A</b> ," is a nucleoid-associated multifunctional protein that acts as a transcriptional repressor, in chromosomal DNA packaging, and as a chaperone) |
| <i>E. coli</i> BW25113 $\Delta$ <i>oxyR</i> | <i>F</i> -, $\Delta$ ( <i>araD-araB</i> )567, $\Delta$ <i>lacZ</i> 4787( <i>::rrnB-3</i> ), $\lambda$ , <i>rph-1</i> , $\Delta$ ( <i>rhaD-rhaB</i> )568, <i>hsdR514</i> , $\Delta$ <i>oxyR</i> (deletion mutant of oxidative stress regulator)                                                                                                                                                                                                    |
| <i>E. coli</i> BW25113 $\Delta$ <i>hns</i>  | <i>F</i> -, $\Delta$ ( <i>araD-araB</i> )567, $\Delta$ <i>lacZ</i> 4787( <i>::rrnB-3</i> ), $\lambda$ , <i>rph-1</i> , $\Delta$ ( <i>rhaD-rhaB</i> )568,                                                                                                                                                                                                                                                                                          |

|                                             |                                                                                                                                                                                                                                                                                                                    |
|---------------------------------------------|--------------------------------------------------------------------------------------------------------------------------------------------------------------------------------------------------------------------------------------------------------------------------------------------------------------------|
|                                             | <i>hsdR514</i> , $\Delta$ <i>hns</i> (deletion mutant of <b>H</b> istone-like <b>n</b> ucleoid structuring protein)                                                                                                                                                                                                |
| <i>E. coli</i> BW25113 $\Delta$ <i>crp</i>  | <i>F</i> -, $\Delta$ ( <i>araD-araB</i> )567, $\Delta$ <i>lacZ4787</i> (:: <i>rrnB-3</i> ), $\lambda$ , <i>rph-1</i> , $\Delta$ ( <i>rhaD-rhaB</i> )568, <i>hsdR514</i> , $\Delta$ <i>crp</i> (deletion mutant of <b>c</b> AMP <b>r</b> eceptor <b>p</b> rotein)                                                   |
| <i>E. coli</i> BW25113 $\Delta$ <i>marA</i> | <i>F</i> -, $\Delta$ ( <i>araD-araB</i> )567, $\Delta$ <i>lacZ4787</i> (:: <i>rrnB-3</i> ), $\lambda$ , <i>rph-1</i> , $\Delta$ ( <i>rhaD-rhaB</i> )568, <i>hsdR514</i> , $\Delta$ <i>marA</i> (deletion mutant of <b>m</b> ultiple <b>a</b> ntibiotic <b>r</b> esistance <b>r</b> egulatory protein)              |
| <i>E. coli</i> BW25113 $\Delta$ <i>baeR</i> | <i>F</i> -, $\Delta$ ( <i>araD-araB</i> )567, $\Delta$ <i>lacZ4787</i> (:: <i>rrnB-3</i> ), $\lambda$ , <i>rph-1</i> , $\Delta$ ( <i>rhaD-rhaB</i> )568, <i>hsdR514</i> , $\Delta$ <i>baeR</i> (deletion mutant of <b>b</b> acterial <b>a</b> daptive <b>r</b> esponse)                                            |
| <i>E. coli</i> BW25113 $\Delta$ <i>cpxR</i> | <i>F</i> -, $\Delta$ ( <i>araD-araB</i> )567, $\Delta$ <i>lacZ4787</i> (:: <i>rrnB-3</i> ), $\lambda$ , <i>rph-1</i> , $\Delta$ ( <i>rhaD-rhaB</i> )568, <i>hsdR514</i> , $\Delta$ <i>cpxR</i> (deletion mutant of <b>c</b> onjugative <b>p</b> lasmid <b>g</b> ene <b>e</b> xpression <b>r</b> egulatory protein) |

## Supplementary Table 2.

Plasmids used in the study

| Plasmid Name          | Description/Resistance                                                                                                                                            | References |
|-----------------------|-------------------------------------------------------------------------------------------------------------------------------------------------------------------|------------|
| <i>pNYL-MCS11</i>     | Plasmid derived from pZE21                                                                                                                                        | 2, 3       |
| <i>pNYL-GFP</i>       | GFP gene was amplified from pPROBE-TT'-GFP and was cloned in <i>pNYL-MCS11</i> plasmid vector on BamHI restriction site.                                          | This study |
| <i>pNYL-ibsC</i>      | Genetic locus coding for toxic peptide <i>ibsC</i> was amplified from <i>E. coli</i> genome and cloned in <i>pNYL-MCS11</i> vector at BamHI restriction site      | This study |
| <i>pNal::ibsC</i>     | Reporter plasmid containing FQ responsive regulating element fused with gene encoding toxic peptide <i>IbsC</i> . Vector backbone codes for kanamycin resistance. | This study |
| <i>pNal::GFP</i>      | Reporter plasmid containing FQ responsive promoter fused with GFP.                                                                                                | This study |
| <i>pRx::ibsC</i>      | Control plasmid containing <i>pNYL-MCS</i> backbone without FQ responsive promoter sequences.                                                                     | This study |
| <i>pNal::ibsC-amp</i> | From vector backbone of <i>pNal::ibsC</i> , kanamycin resistant selection marker gene was replaced by ampicillin resistant gene                                   | This study |
| <i>pRx::ibsC-amp</i>  | From vector backbone of <i>pRx::ibsC</i> , kanamycin resistant selection marker gene was replaced by ampicillin resistant gene.                                   | This study |

### **Supplementary Figure S1.**

Alignment of promoter regions of representative prokaryotic stress responsive genes using ClustalW2 online bioinformatics program.

### **Supplementary Figure S2. Schematic representation of cloning and screening of combinatorial oligonucleotide library.**

A) Commercially synthesized single stranded combinatorial oligonucleotide library were converted in to double stranded DNA fragment and double digested with *XhoI* and *HindIII*. Double digested library were ligated with *XhoI-HindIII* digested fragment of pNYL-ibsC/GFP plasmid vector and transformed in *E. coli* RFM443 (Details are available in material and method section). B) To screen the inducible regulatory elements, a live and dead screening strategy has been adopted. Bacterial colonies were selected from the transformed plate and inoculated individually into 96 well plate containing 200  $\mu$ l LB broth. The grown cultures were then replica plated on a 96 well plate which contained various toxicants including DNA damaging [fluoroquinolones, mitomycin C], protein damaging [ethanol] and heavy metals [sodium arsenite, cadmium chloride, lead chloride] at sub-lethal concentrations and absorbance after incubation was measured at 600 nm. C) The presence of toxicants induces the expression of the toxic peptide IbsC which leads to the killing of the bacterial cells. The IbsC toxic peptide based reporter system selectively screens out the clones harboring functional combinatorial promoters against leaky and constitutive promoters.

### **Supplementary Figure S3.**

*E. coli* BL21 DE3 strain harboring pET28a-hns was induced with 1mM IPTG Analysis of the purified H-NS protein on 12.5% sodium dodecyl sulphate-polyacrylamide gel electrophoresis (SDS-PAGE).

### **Supplementary Figure S4.**

Nucleotide sequence of clones representing constitutive promoters (a,b,c,d,e,f,g and h) covering a wide range of GFP fluorescence intensity.

**Supplementary Figure S5.**

Multiple sequence alignment of FQ-responsive regulatory element with the selected stress promoters from *E. coli* genome. FQ-responsive regulatory element displayed no homology with stress promoter sequences encoded in *E. coli* genome.

**Supplementary Figure S6.**

Response of FQ responsive promoter in bacterial host lacking efflux pump *tolC* gene and wild type *E. coli* strain in the presence of nalidixic acid. A-B) Wild type  $\Delta tolC$  bacterial strains harboring *pNal::ibsC-amp* (test) and *pRx::ibsC-amp* (control) plasmid was induced with nalidixic acid.

**Supplementary Figure S7.**

Growth pattern of various stress regulator gene knock out strains of *E. coli* harboring *pNal::ibsC-amp* and *pRx::ibsC-amp* fusion system. The growth assays were carried out in duplicate for the *E. coli* mutant strain harboring *pNal::ibsC-amp* plasmid (test) and *pRx::ibsC-amp* plasmid (control).

**Supplementary Figure S8.** *In-silico* DNA curvature analysis of FQ responsive (Nal) promoter and their mutant variants at spacer region ( 'all A' and 'all T').

Figure S1

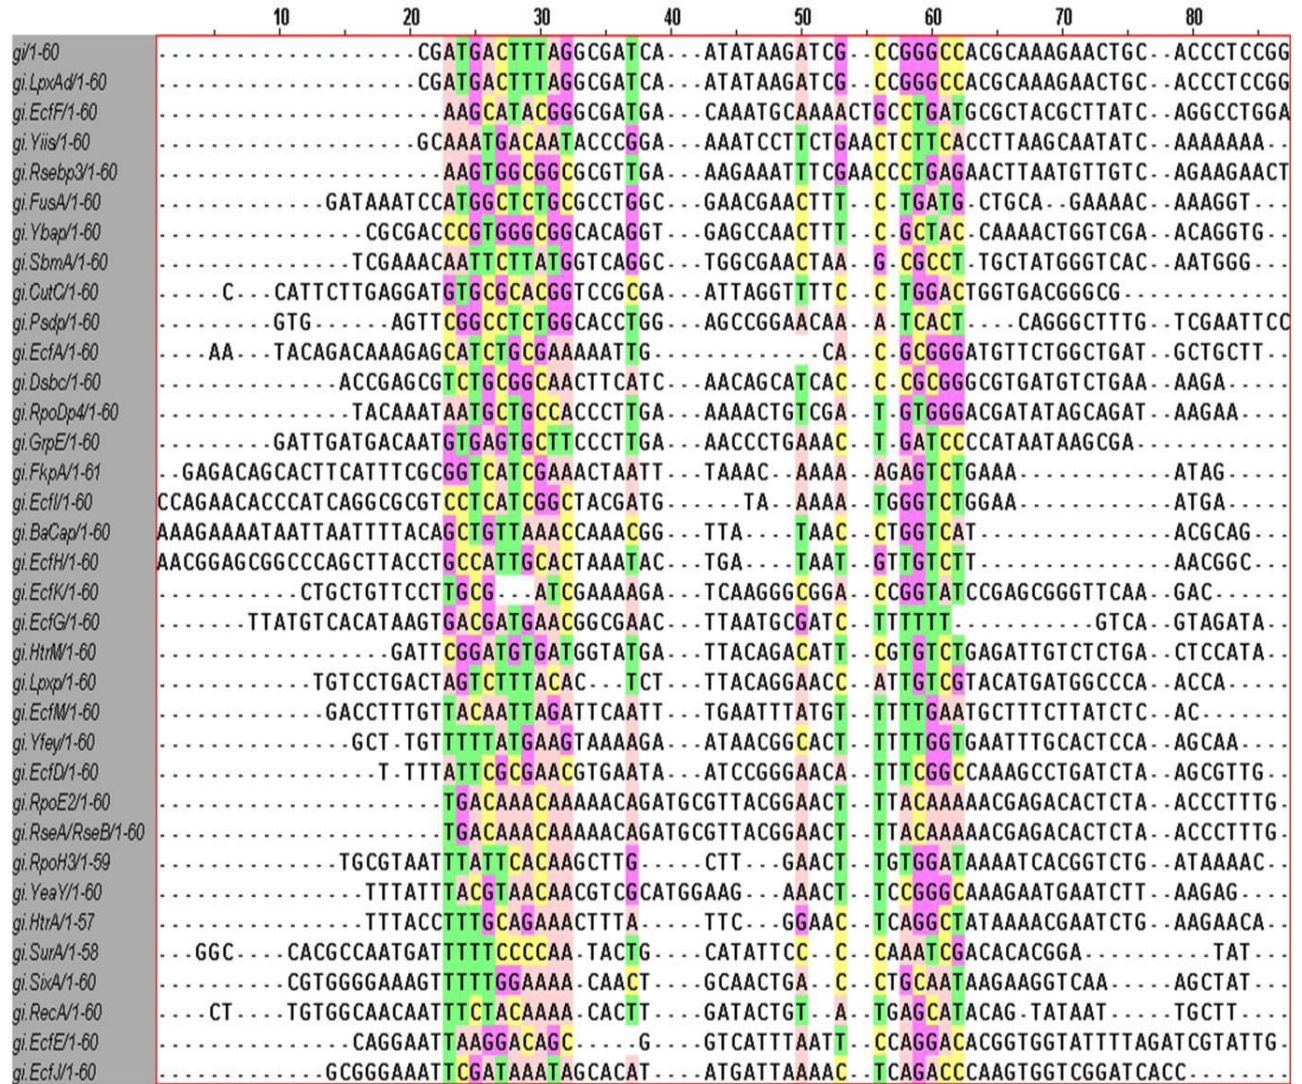

Figure S2

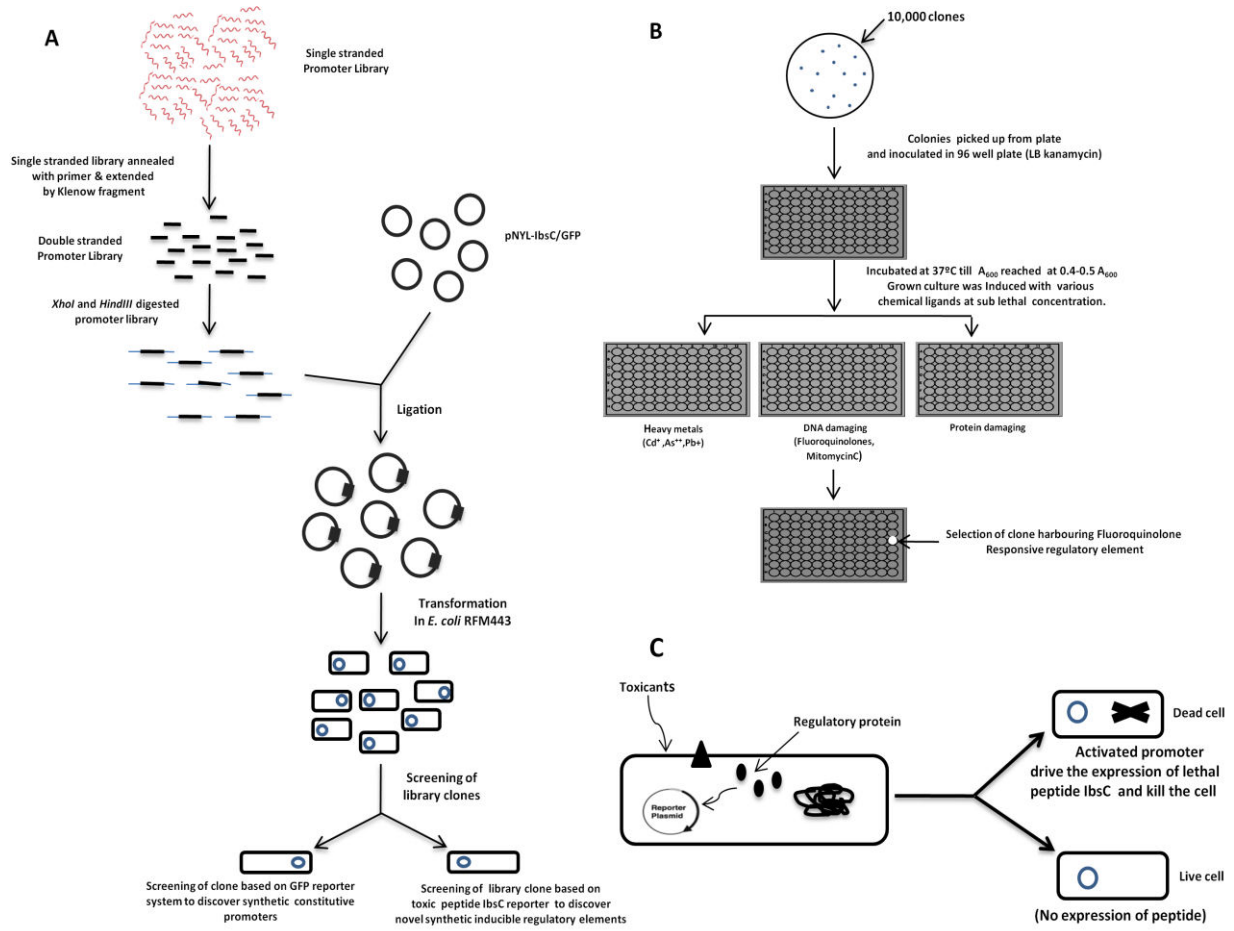

Figure S3

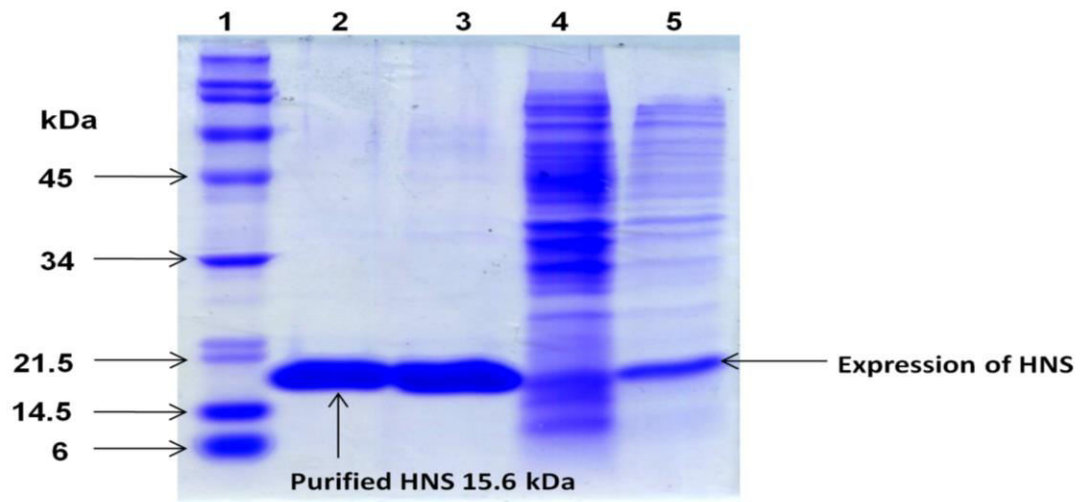

Lane-1 Broad range protein marker

Lane-2 Purified fraction1

Lane-3 Purified fraction2

Lane-4 Uninduced

Lane-5 *pET28a-hns* cellular extract induced with 0.5 mM IPTG



## Figure S4

### Clone-a

CTTTTGTTTACGTCTTCCCTCGAGATCAGTCAAATACAGCGCAACTCGTAAAAAGGGGGAGTTTCCAACAATCCAGGCAGTCATAT  
CTAAGCTTAGATATGACGCACCGTTTATTCCGAGCCTGAGGGTTTTTCGGGGTTTGTCTCTAATGACTTGATCTCGAGATCAAGT  
CATAAAAGTTGAAACCATCAAAAAGGCGCAGCCTCAGATTATCACGGGGTCATATCTAAGCTTAGATATGACACCCCTGTTGGT  
GGGACCTACTCCCTTTTTAGAGTTGACGTCAAATGACTTGATCTCGAGATCAAGTCATTATAGTGGAACATGAAAAATACGA  
CTGGTCGCACCAACCGCGAGTCATATCTAAGCTTGATATCGAATTCCTGCAGCCCGGGGATCCATAAGGAGGAAAAACATATG  
AGTAAAGGAGAAGAACTTTTACTGGAGT

### Clone -b

TGGGTTTTTTATCTTTCCCTCGAGATCAGTCAATCCCGTTAAACCACGAAAAATAACAGGTTTCGTATAAAACGCGGGTCATA  
TCTAAGCTTAGATATGACGCCCGGTAATCTGAAAGTCAATTTTTACTAGTTCGCCAGGTATTGACTTGATCTCGAGATCAAG  
TCATATTTAAACAAAACCCGAAAAAGCAATGGTCAAACCTATCCGGGGCGTCATATCTAAGCTTAGATATGACCCCAAGTTAG  
TCAGACACCCCTTTTTGTGGTTGAAACCGTTTTGACTTGATCTCGAGATCAAGTCAATATGGCCCAAACTAAAAAATCGC  
GCATATCGAATTTAAGGTAAGTCATATCTAAGCTTGATATCGAATTCCTGCAGCCCGGGGATCCATAAGGAGGAAAAACATAT  
GAGTAAAGGAGAAGAACTTTTACTGGA

### Clone- c

TGCATACATTTATCTTTCCCTCGAGATCAAGTCAAAAATCCTGGCAACAATGCAAAAAGTTCTCGCATCGGACTAACATGCGCGGCAT  
ATCTAAGCTTAGATATGACGCCAGGAATGTCTGAAGTGTCCCGTTTTTCGGGGTTCACACCCATTTGACTTGATCTCGAGATCAA  
GTCATATAGCAGTGAACAAGTAAAAAGGGAACGTGTCTACCAAACCGGCTGGTCATATCTAAGCTTAGATATGACGCCGTGGTAA  
GTTGGACCTGGGACCTTTTTAGTTGTTACGCCACAAATGACTTGATCTCGAGATCAAGTCATTACTCTCAACCCCAAAAAATCC  
TAGGGTTCGGACATAAAGTCCGGTCATATCTAAGCTTAGATATGACGAGCAGTTTGTTCAGACACGTGGCCTTTTTACTTGTGGT  
CAGGTAATGACTTGATCTCGAGATCAAGTCAATAACTCGGCAAAACACGCAAAAAGAGCGTGGGTCCGAAAAACCGCGGAGTCATA  
TCTAAGCTTGATATCGAA

### Clone-d

GTCCCGGGGTTTTTATTCTTCTCGAGATCAGTCATTTTCTTATAAACTCATAAAAAATGAACTATTCTTAACTAAAGATAGGTCAT  
ATCTAAGCTTAGATATGACTCCCCGTTAAATCCGACCCGGGGCATTTTTGATAGTTTACGGGAAAAATGACTTGATCTCGAGATCAA  
GTCAATTTAAGACAAACCCCTTAAAAAGCGTATGGCTCGCACAAAACCGGGCGGTCATATCTAAGCTTGATATCGAATTCCTGCAGC  
CCGGGGATCCATAAGGAGGAAAAACATATGAGTAAAGGAGAAGAACTTTTACTGGAGTTGTCCCAATTCCTTGTG

### Clone- e

TAGGGTTTTTGTCTTACTCGAGATCAGTCAAATCGCGGACCAAAAAAAGGGGTGCCGGTCCAATTTACCTCCCGTCATATCTA  
AGCTTAGATATGACCCCTAGGAATGTCAGACCAGGGCTCTTTTTATTGTTGAATATGTTATGACTTGATCTCGAGATCAAGTCAA  
TTGCGGCTCAACCAGGAAAAAGCGAGCAAGTCCGATCTTCACGAGTGTCTATCTAAGCTTGATATCGAATTCCTGCAGCCCGG  
GGATCCATAAGGAGGAAAAACATATGAGTAAAGGAGAAGAACTTTTACTGGAGTTGTCCCAATTCCTGTTGAATTAGATGGTGA  
TGTTAATGGGCACAAATTTTCTGTCAGTGGAGAGGGT

### Clone f

CGGGGTTTTTCGTTCTTACTCGAGATCAAGTCATTTGTTGTGCAACCCGAAAAAGCAGCCGGCTCATACTATACGCACGGTCATAT  
CTAAGCTTAGATATGACGCACATTAAGTGAGAGACCGCGGCTTTTTGAGAGTTGCGGGGAAATGACTTGATCTCGAGATCAAG  
TCATTTGTCGTGAACTACAAAAAAGTCGCTGTTTCGCAATTACCGGGCCGTCATATCTAAGCTTGATATCGAATTCCTGCAGCCC  
GGGGATCCATAAGGAGGAAAAACATATGAGTAAAGGAGAAGAACTTTTACTGGAGTTGTCCCAATTCCTGTTGAATTAGATGGT  
TGATGTTAATGGGCACAAATTTTCTGTCAGTGGAGAGG

### Clone g

TTTGGTTTTTCGTTCTTACTCGAGATCAGTCAATAGGAGCCGAACCCAAAAAAGGTGGCCGTTCCAATTTTCCGCGGGGTCATATCT  
AAGCTTGATATCGAATTCCTGCAGCCCGGGGATCCATAAGGAGGAAAAACATATGAGTAAAGGA

### Clone-h

CGGGGGTTTTTTCGGTCTTAACTCGAGATCAGGTCATTATCGTTGGAACATTAAAAAATTTTGTGTTTCGTAATACCCATTTCGTCA  
TATCTAAGCTTAGATATGACCCCGGAAAAATCCGACGTCAGACGTTTTTCGTTGTTGCAACATATGACTTGATCTCGAGATCA  
AGTCAGGGTACCCTTTATGATTTTCACTCGCTCTATAAATCAGATAGTCATATCTAAGCTTGATATCGAATTCCTGCAGCCCG  
GGGATCCATAAGGAGGAAAAACATATGAGTAAAGGAGAAGAACTTTTACTGGAGTTGTCCCAATTCCTGTTGAATTAGATGGT  
ATGTTAATGGGCACAAATTTTCTGTCAGTGGAGAGGGT

Figure S5

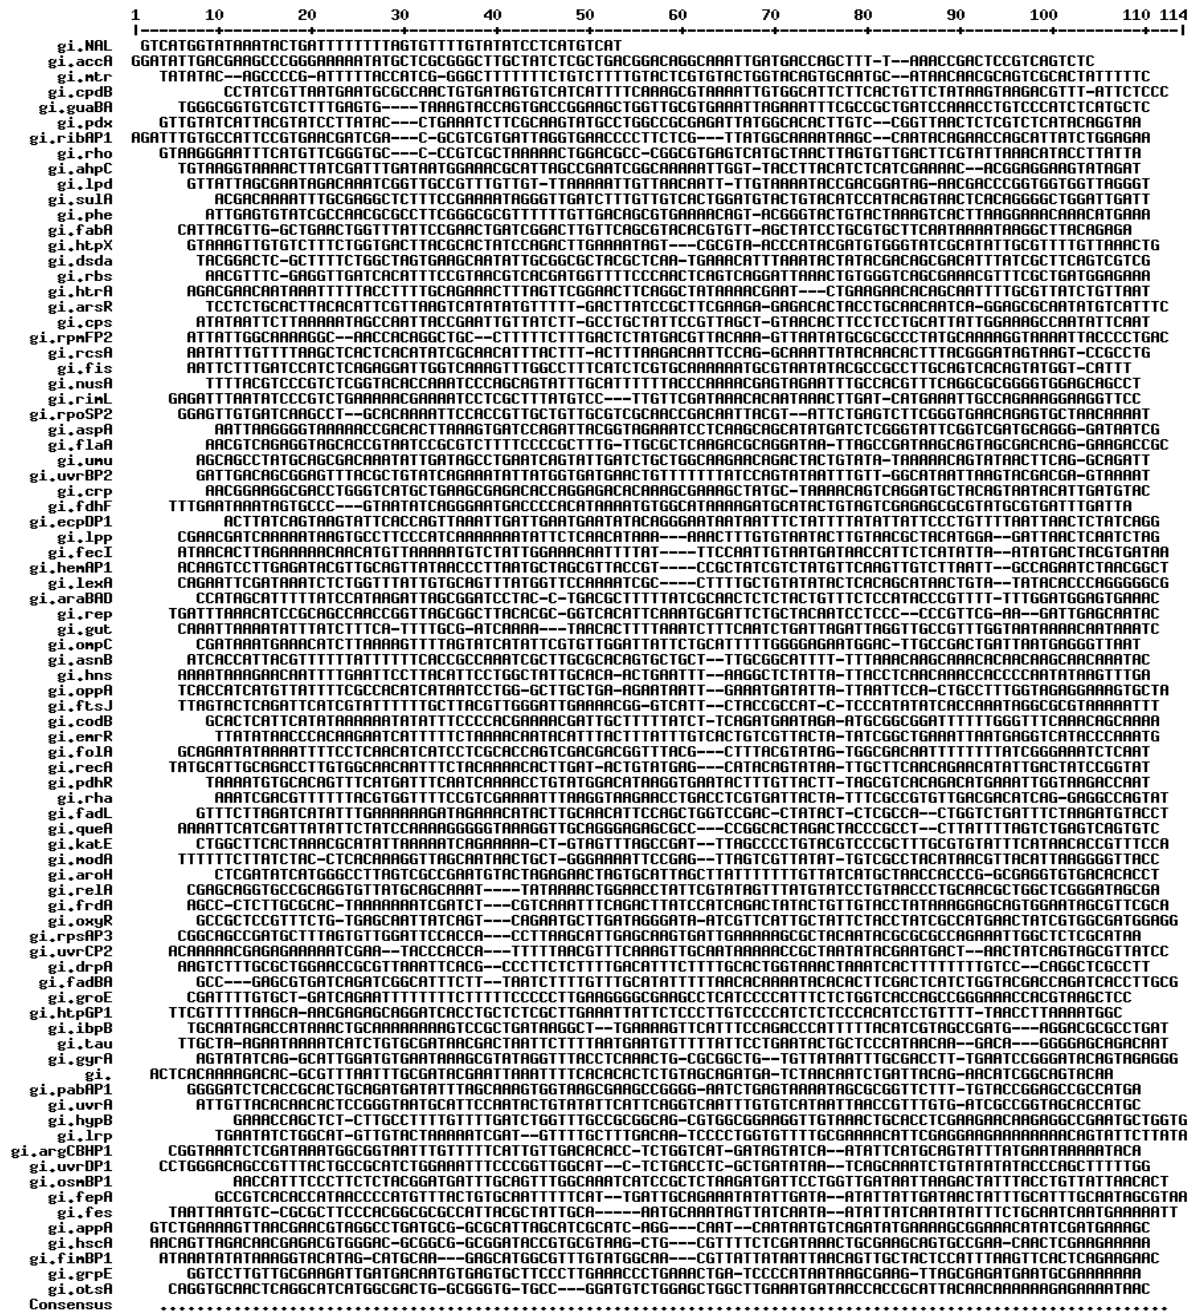

Figure S6

**A**

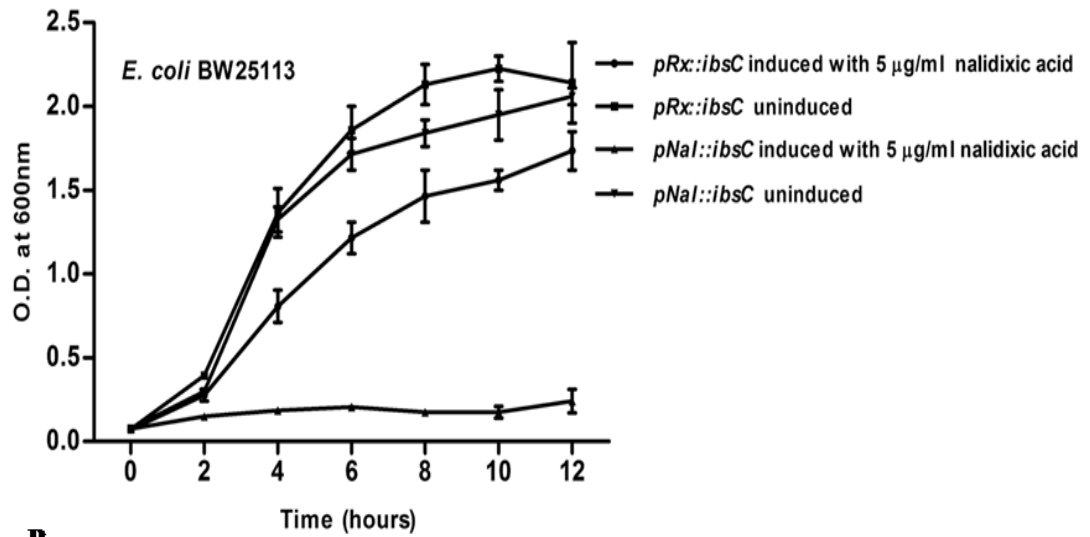

**B**

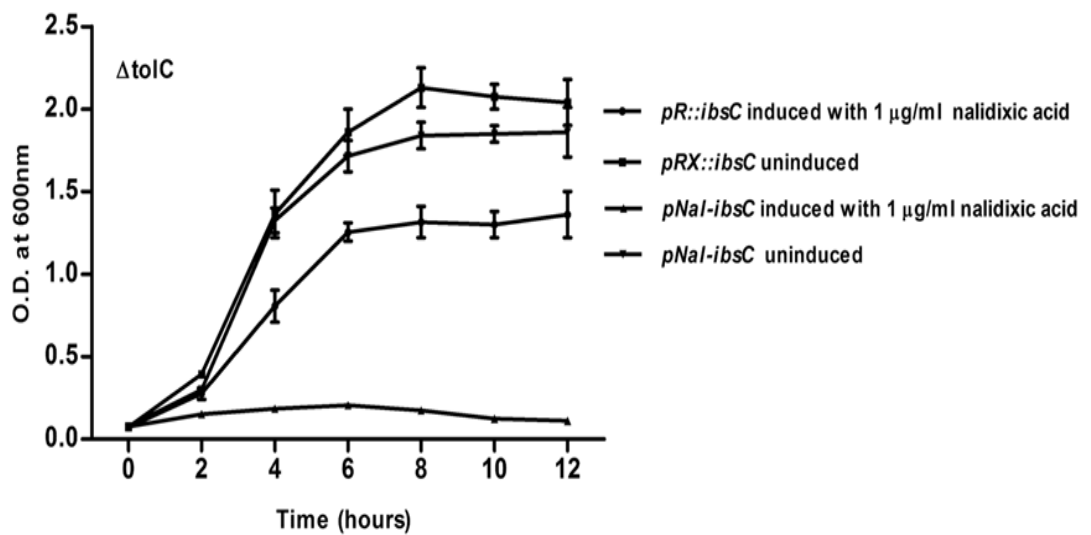

Figure S7

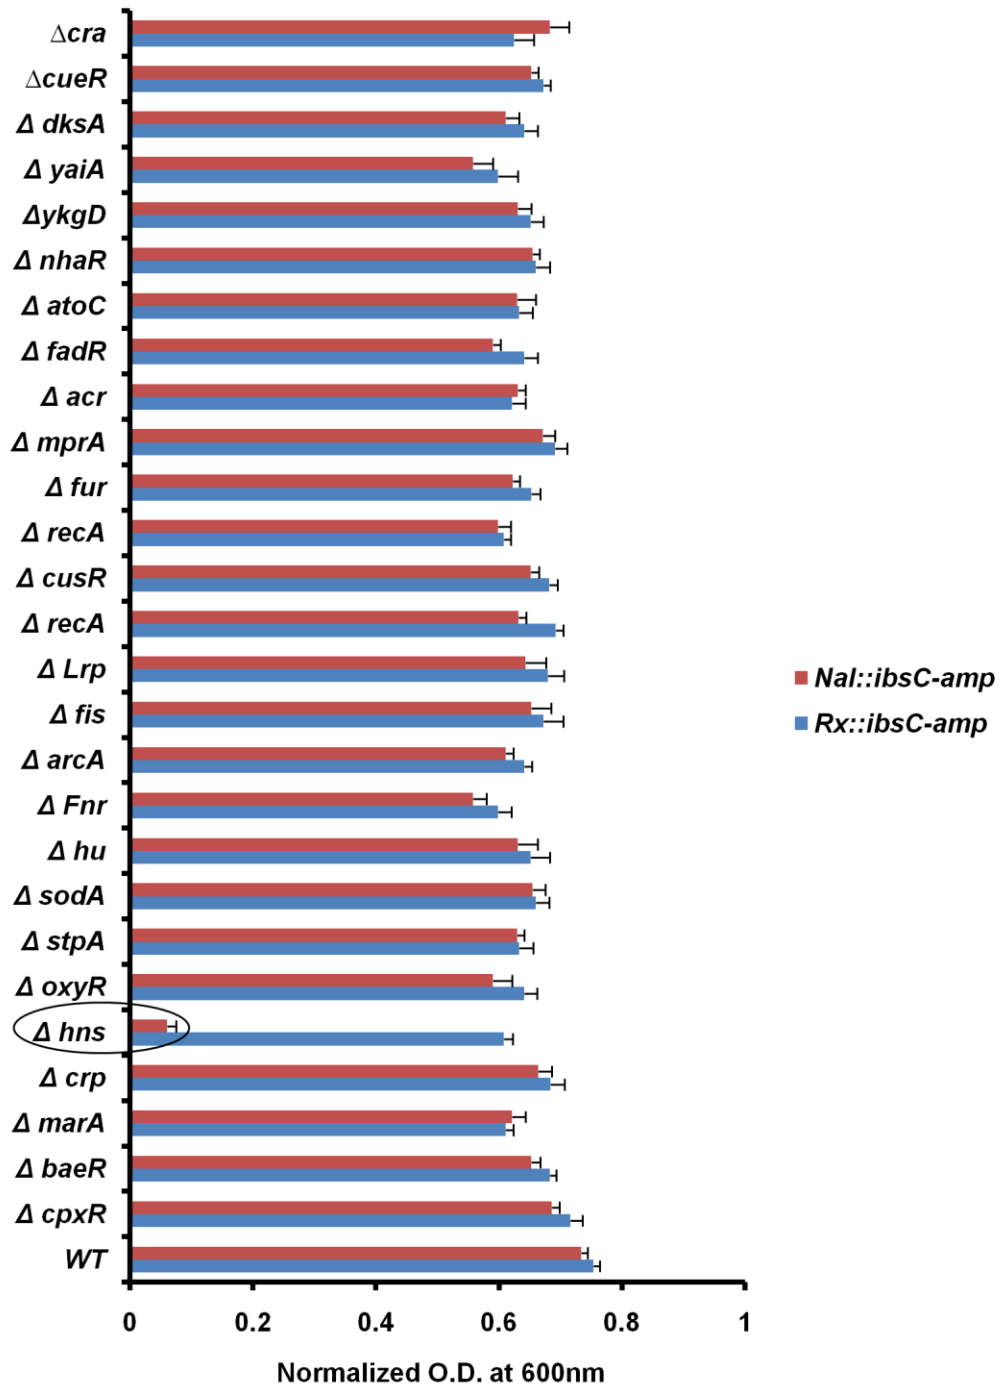

**Figure S8**

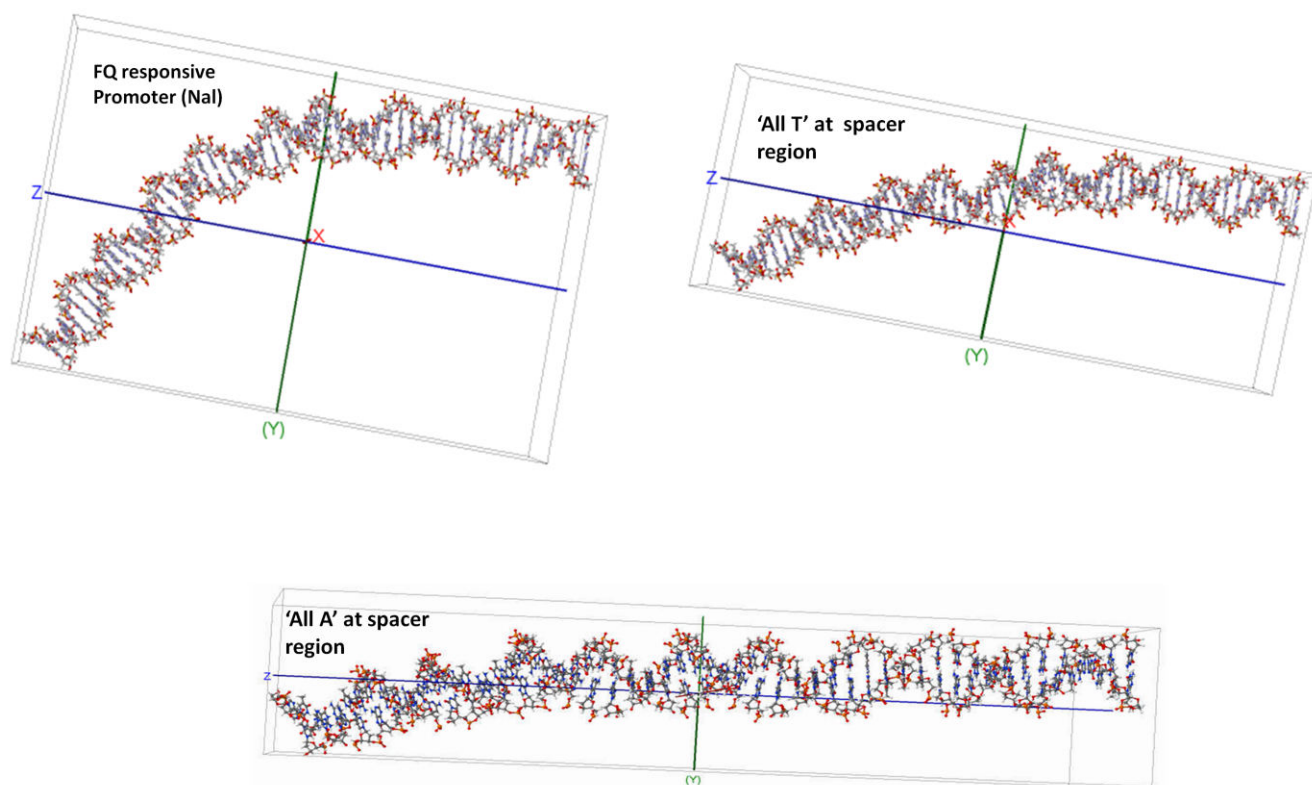

Supplement: supp_gkw029_nar-01839-v-2015-File002.pdf [file supp_gkw029_nar-01839-v-2015-File002.pdf]
